# Supplementary material
Source: PubMed Central journal article supplement (PMC3586692)

Figure S1  
PVR - DNAM1 in TEM  
Sullivan *et al.* 2012

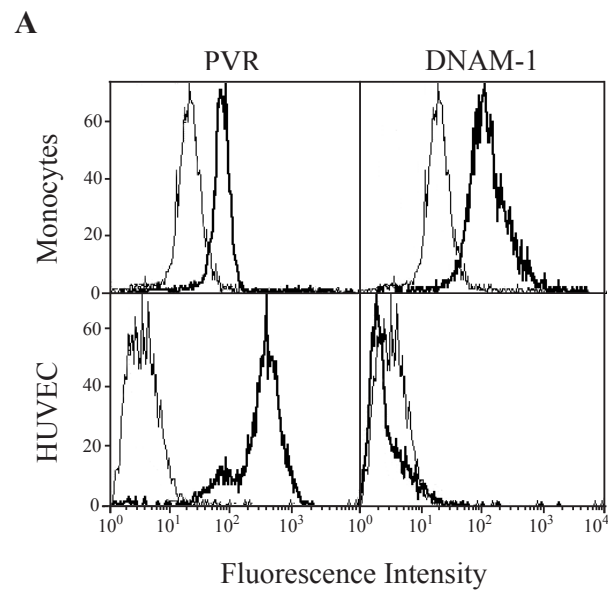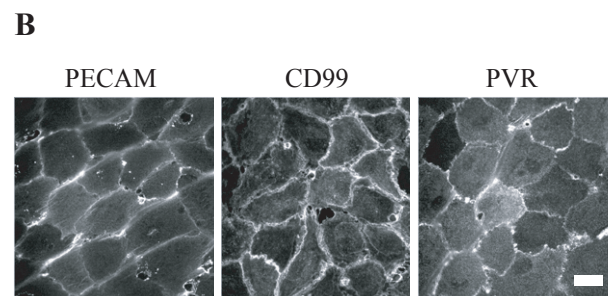

Supplement: mmc1.pdf [file mmc1.pdf]
