# Supplementary material
Source: PubMed Central journal article supplement (PMC3586692)

Figure S3  
PVR - DNAM1 in TEM  
Sullivan *et al.* 2012

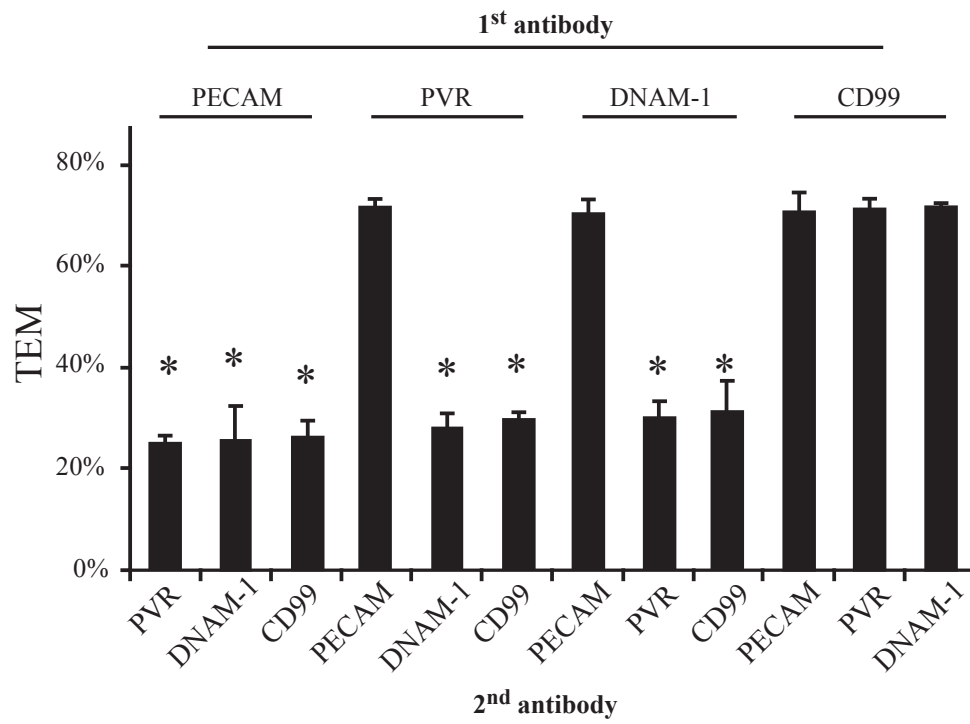

Supplement: mmc3.pdf [file mmc3.pdf]
